# Supplementary material for: Accuracy of P0.1 measurements performed by ICU ventilators: a bench study
Source: Springer Nature journal article supplement (doi:10.1186/s13613-019-0576-x), 2019-09-13

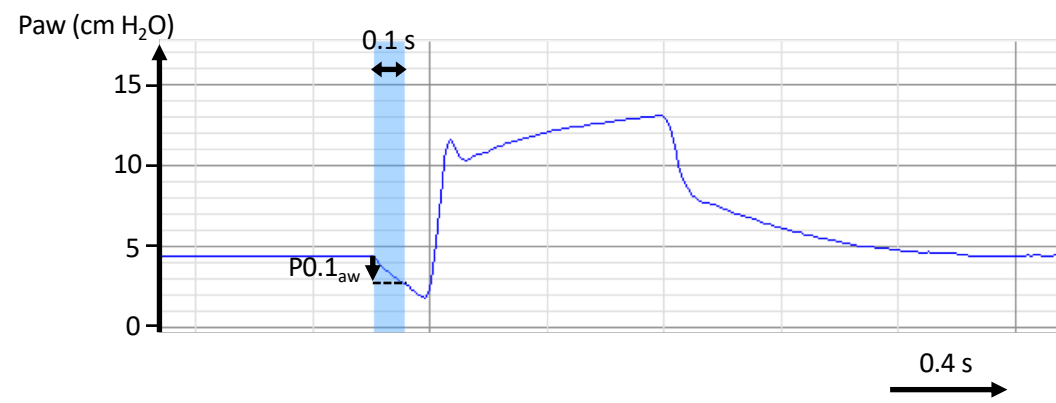

Supplement: MOESM1 [file 17170360]
