# Supplementary material for: Accuracy of P0.1 measurements performed by ICU ventilators: a bench study
Source: Springer Nature journal article supplement (doi:10.1186/s13613-019-0576-x), 2019-09-13

### Normal Cycle

### Cycle with automated P0.1 measurement

A Löwenstein Medical Elisa 800®

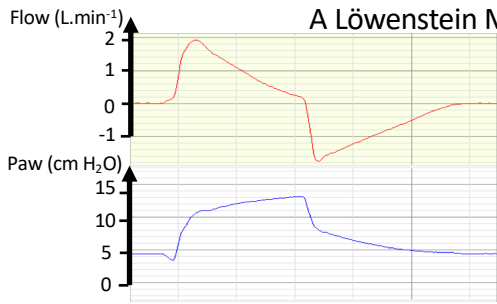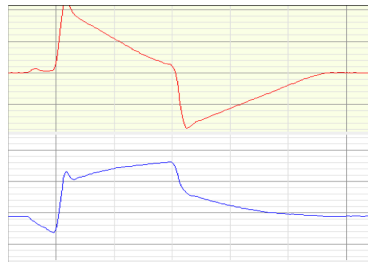

B Getinge Group Servo-u®

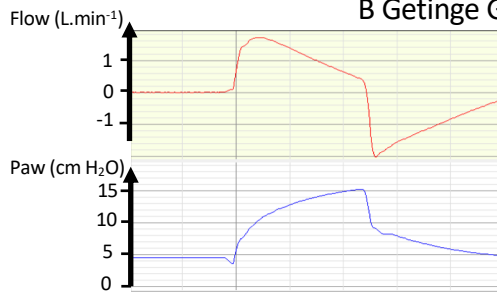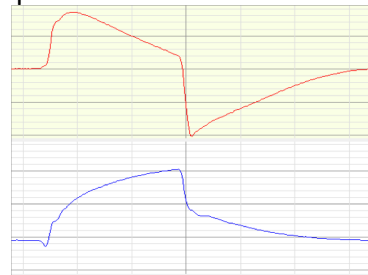

0.4 s

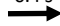

Supplement: MOESM2 [file 17170360]
